# Supplementary material for: Secretome Analyses Identify FKBP4 as a GBA1-Associated Protein in CSF and iPS Cells from Parkinson’s Disease Patients with GBA1 Mutations
Source: MDPI journal article supplement (doi:10.3390/ijms25010683), 2024-01-04
Supplement: s1 [file s1]

## Supplementary Figures

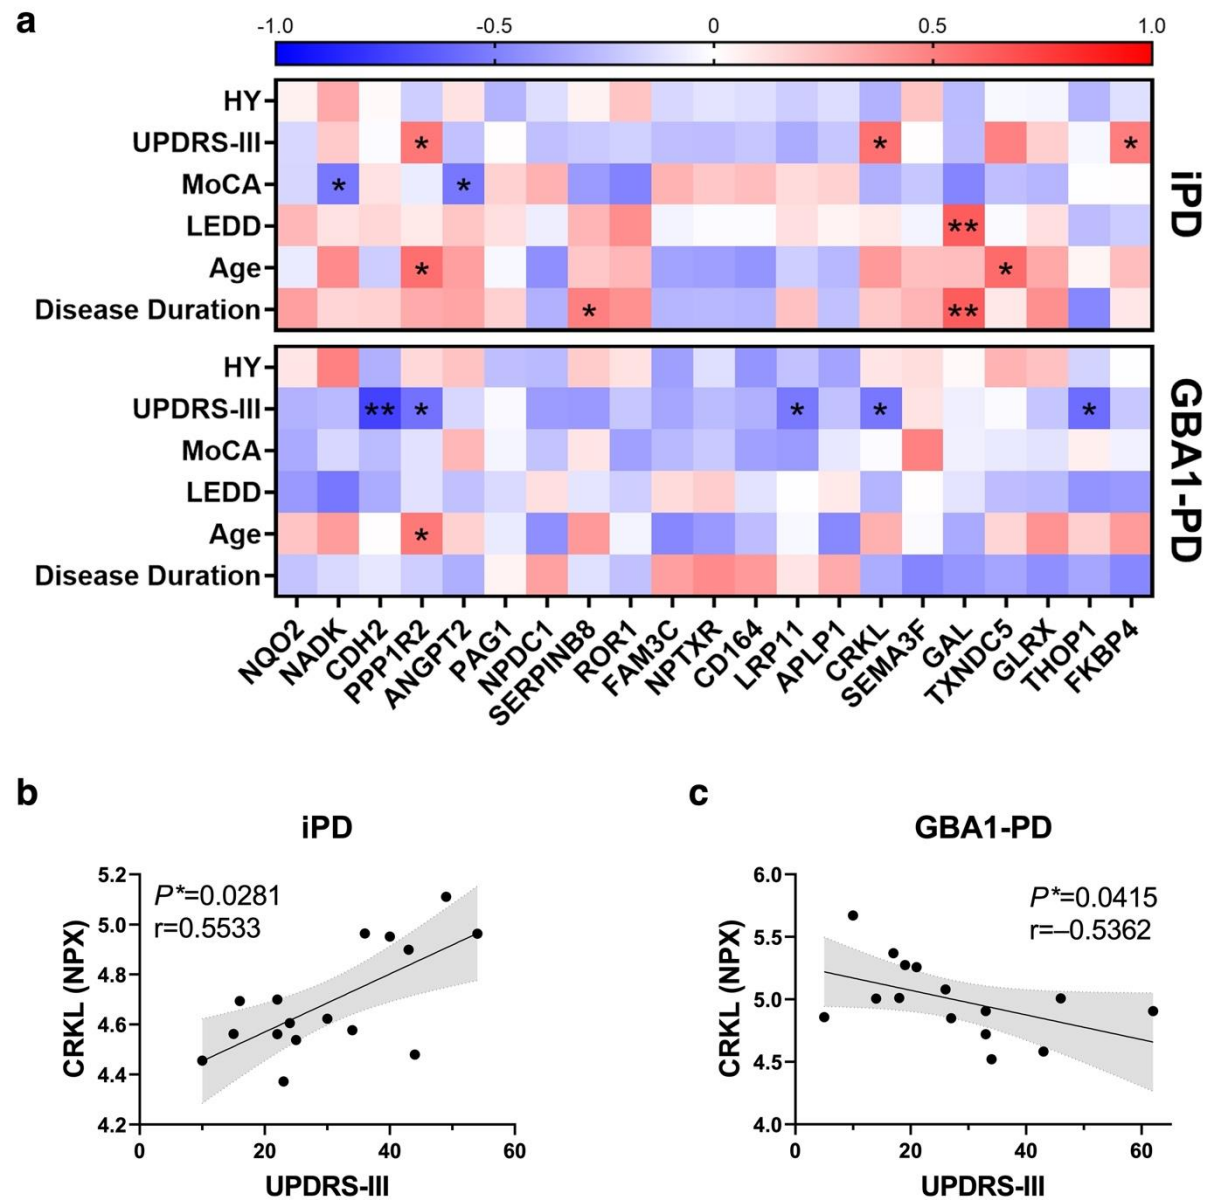

**Supplementary Figure S1.** Correlations of CRKL CSF levels with UPDRS-III scores. (a) Heatmaps showing Spearman's rank correlation coefficient between the CSF hit candidate protein levels and clinical scores of iPD and GBA1-PD. (b) Scatter plots showing a positive correlation between CRKL levels and UPDRS part III (UPDRS-III) scores in iPD ( $n = 16$ ) and (c) negative correlation in GBA1-PD ( $n = 15$ ). Lines represent linear regression with 95% confidence intervals. Two-tailed Spearman's rank correlation coefficient,  $*$  =  $p < 0.05$ ,  $**$  =  $p < 0.01$

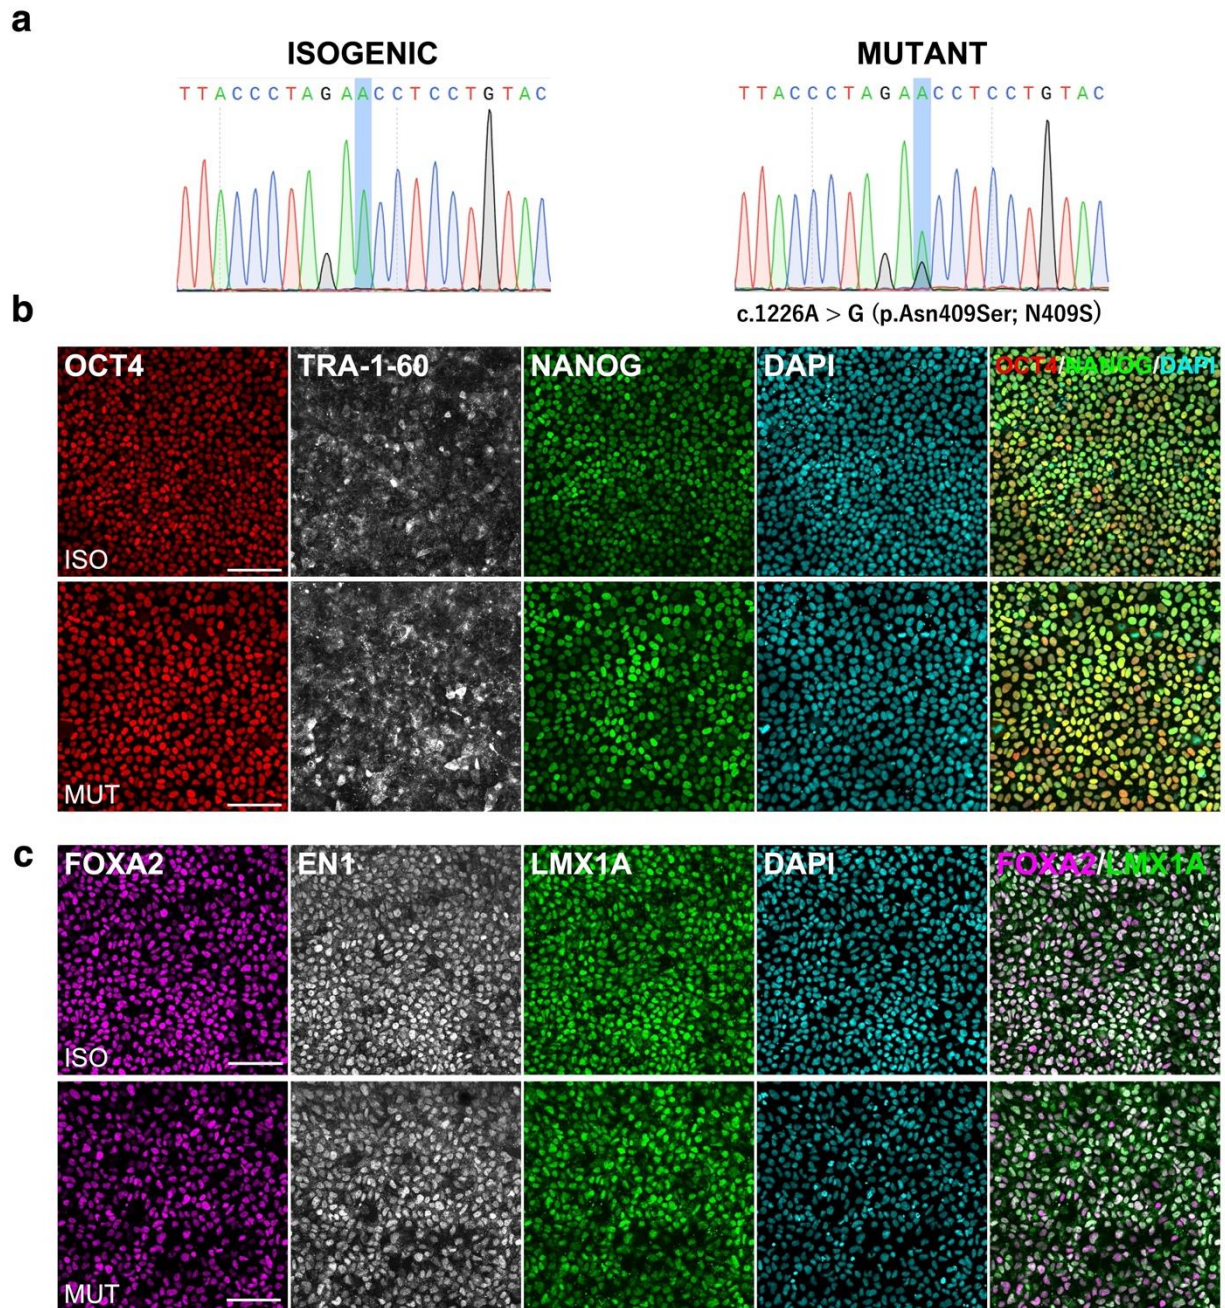

**Supplementary Figure S2.** Characterization of *GBA1* N409S mutant/isogenic iPSCs and mFP progenitors. (a) Genotype analysis on *GBA1* N409S mutant and isogenic iPSCs was conducted after 3+ passages from thawing. (b) Representative immunostaining of pluripotency markers (OCT4, TRA-1-60, NANOG) on undifferentiated *GBA1* N409S mutant and isogenic iPSCs. (c) Representative immunostaining of floor plate markers (FOXA2, EN1, LMX1A) on D11 *GBA1* N409S mutant and isogenic mFP progenitors. Scale bars, 100  $\mu$ m.

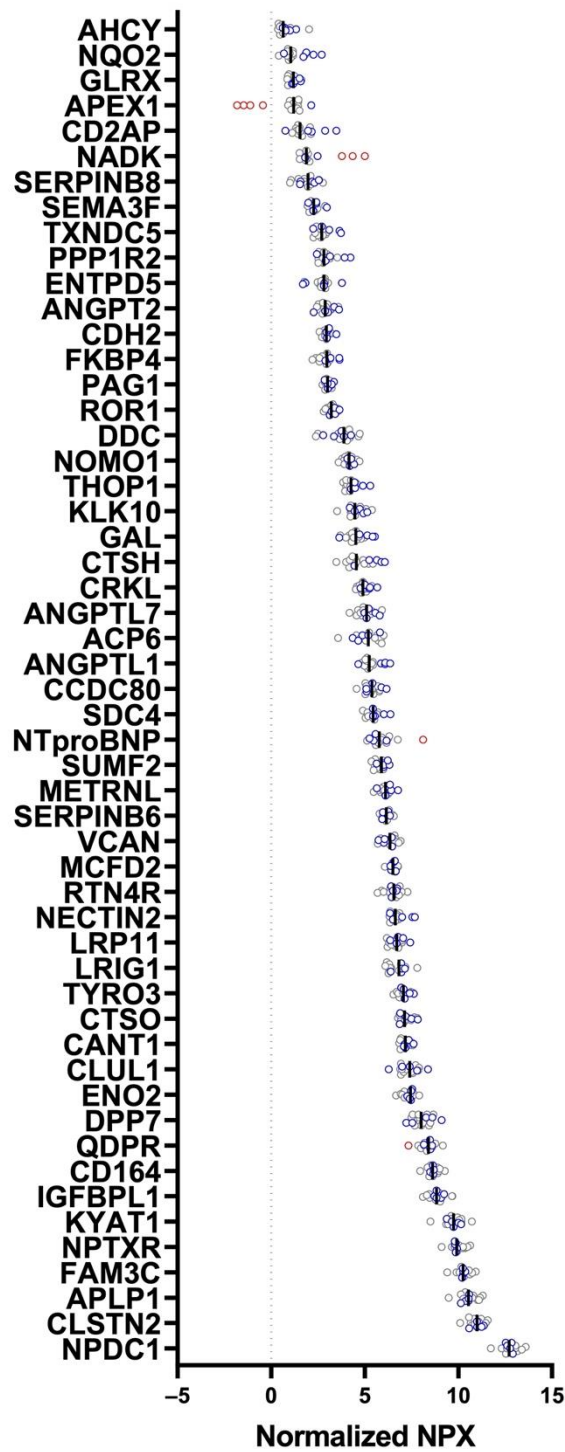

**Supplementary Figure S3.** Distributions of GBA1-PD CSF NPX values from two cohorts. Distributions of NPX values from 17 GBA1-PD CSF samples after normalization. Data from Cohort II (n = 5) and Cohort I (n = 12) were shown as blue and grey, respectively. Outliers colored in red were detected by the ROUT method (Q = 1%) and removed from the downstream analysis. The black bar represents the median.

## Supplementary Tables

**Supplementary Table S1.** List of proteins included in the analysis.

| Protein  | Olink ID | Protein   | Olink ID |
|----------|----------|-----------|----------|
| LRIG1    | OID01121 | NOMO1     | OID01172 |
| NPTXR    | OID01122 | NQO2      | OID01173 |
| AHCY     | OID01123 | FAM3C     | OID01175 |
| THOP1    | OID01124 | TXNDC5    | OID01176 |
| CTSO     | OID01125 | PPP1R2    | OID01177 |
| CD164    | OID01127 | DPP7      | OID01178 |
| DDC      | OID01128 | LRP11     | OID01179 |
| ACP6     | OID01129 | MCFD2     | OID01183 |
| ANGPT2   | OID01132 | SUMF2     | OID01185 |
| CD2AP    | OID01133 | CANT1     | OID01186 |
| ANGPTL7  | OID01134 | GAL       | OID01188 |
| GLRX     | OID01137 | CDH2      | OID01189 |
| ENO2     | OID01138 | TYRO3     | OID01190 |
| NADK     | OID01139 | CRKL      | OID01191 |
| SERPINB8 | OID01141 | IGFBPL1   | OID01192 |
| SERPINB6 | OID01142 | RTN4R     | OID01193 |
| CCDC80   | OID01144 | VCAN      | OID01194 |
| SEMA3F   | OID01147 | NECTIN2   | OID01198 |
| KLK10    | OID01148 | FKBP4     | OID01201 |
| ANGPTL1  | OID01150 | SDC4      | OID01202 |
| APLP1    | OID01151 | PAG1      | OID01203 |
| QDPR     | OID01162 | KYAT1     | OID01204 |
| APEX1    | OID01164 | NPDC1     | OID01206 |
| ENTPD5   | OID01165 | METRNL    | OID01207 |
| CLSTN2   | OID01166 | ROR1      | OID01209 |
| CLUL1    | OID01168 | NT-proBNP | OID01214 |
| CTSH     | OID01171 |           |          |

**Supplementary Table S2.** List of the significantly correlated CSF proteins with clinical scores ( $p < 0.05$ ).

| iPD      |                  |              |                 |
|----------|------------------|--------------|-----------------|
| Protein  | Clinical Scores  | Spearman's r | <i>p</i> -value |
| GAL      | Disease duration | 0.6348       | 0.0074          |
| GAL      | LEDD             | 0.6331       | 0.0076          |
| TXNDC5   | Age              | 0.5779       | 0.0167          |
| PPP1R2   | Age              | 0.5620       | 0.0206          |
| CRKL     | UPDRS-III        | 0.5533       | 0.0281          |
| ANGPT2   | MoCA             | -0.5335      | 0.0353          |
| PPP1R2   | UPDRS-III        | 0.5327       | 0.0356          |
| NADK     | MoCA             | -0.5335      | 0.0427          |
| SERPINB8 | Disease duration | 0.4975       | 0.0442          |
| FKBP4    | UPDRS-III        | 0.5092       | 0.0458          |
| GBA1-PD  |                  |              |                 |
| Protein  | Clinical Scores  | Spearman's r | <i>p</i> -value |
| CDH2     | UPDRS-III        | -0.7399      | 0.0023          |
| THOP1    | UPDRS-III        | -0.5755      | 0.0269          |
| PPP1R2   | Age              | 0.5237       | 0.0328          |
| PPP1R2   | UPDRS-III        | -0.5559      | 0.0337          |
| CRKL     | UPDRS-III        | -0.5362      | 0.0415          |
| LRP11    | UPDRS-III        | -0.5273      | 0.0456          |

**Supplementary Table S3.** List of the significantly altered CSF proteins ( $q < 0.05$ ) and the hit candidate iPSC proteins ( $p < 0.05$ ).

| Significantly altered CSF proteins ( $q < 0.05$ , with 5% FDR correction) |                     |                 |          |
|---------------------------------------------------------------------------|---------------------|-----------------|----------|
| Protein                                                                   | Log <sub>2</sub> FC | <i>p</i> -value | q-value  |
| FKBP4                                                                     | 0.4498              | 0.000641        | 0.020880 |
| THOP1                                                                     | 0.3901              | 0.000904        | 0.020880 |
| GLRX                                                                      | 0.3123              | 0.001839        | 0.021499 |
| TXNDC5                                                                    | 0.4063              | 0.001861        | 0.021499 |
| GAL                                                                       | 0.5596              | 0.003327        | 0.025027 |
| SEMA3F                                                                    | 0.3449              | 0.003864        | 0.025027 |
| CRKL                                                                      | 0.2739              | 0.004147        | 0.025027 |
| APLP1                                                                     | -0.7401             | 0.004334        | 0.025027 |
| LRP11                                                                     | 0.3384              | 0.007526        | 0.038634 |
| CD164                                                                     | -0.4106             | 0.009509        | 0.043627 |
| NPTXR                                                                     | -0.4939             | 0.010387        | 0.043627 |

  

| Hit candidate iPSC proteins ( $p < 0.05$ , without correction) |                     |                 |
|----------------------------------------------------------------|---------------------|-----------------|
| Protein                                                        | Log <sub>2</sub> FC | <i>p</i> -value |
| CLUL1                                                          | -0.9152             | 0.005101        |
| PPP1R2                                                         | 1.348               | 0.007651        |
| LRIG1                                                          | 1.205               | 0.007696        |
| DDC                                                            | 1.986               | 0.010607        |
| CCDC80                                                         | 1.773               | 0.011934        |
| SERPINB8                                                       | 0.6518              | 0.013627        |
| CRKL                                                           | 1.077               | 0.016966        |
| GAL                                                            | -0.6782             | 0.023089        |
| FKBP4                                                          | 0.8373              | 0.023188        |
| ANGPTL1                                                        | 1.894               | 0.023859        |
| GLRX                                                           | 0.6074              | 0.033994        |
| NECTIN2                                                        | 0.5961              | 0.037606        |
| FAM3C                                                          | 0.6826              | 0.037709        |
| SUMF2                                                          | 1.310               | 0.045527        |
| THOP1                                                          | 0.5371              | 0.048483        |
| CANT1                                                          | 0.5079              | 0.049715        |
